# Supplementary material
Source: publisher figshare collection journal article supplement (https://acs.figshare.com/ndownloader/files/3843445)
Supplement: Supplementary file 1 [file 3843445]

**Supporting Information**  
**for**

**Novel Antioxidants Protect Mitochondria from the Effects of Oligomeric Amyloid Beta and Contribute to the Maintenance of Epigenome Function**

**Diego Mastroeni, Omar M. Khdour, Pablo M. Arce, Sidney M. Hecht, and Paul D. Coleman**

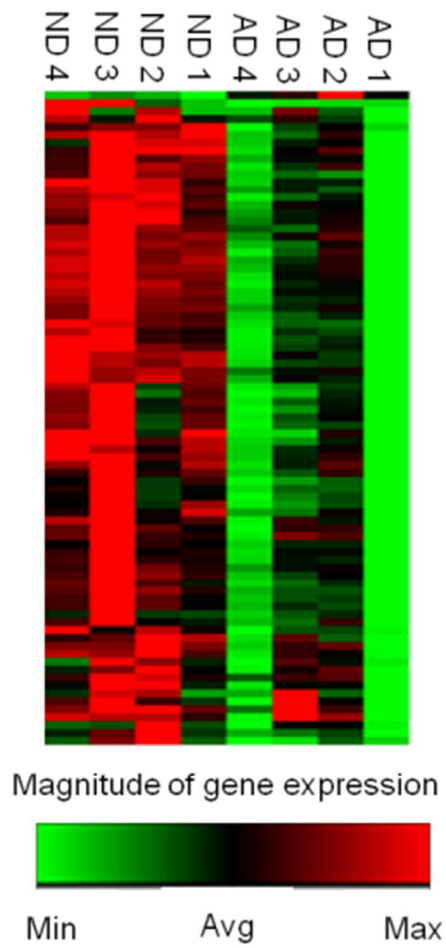

**Figure S1.** Heat maps of relative gene expression levels of control brain (ND) vs AD brain. Magnitude of expression depicted as a heat map with red representing higher and green lower levels of relative gene expression levels.

## Gene list

|   | 1      | 2      | 3       | 4       | 5       | 6        | 7     | 8     | 9      | 10      | 11    | 12     |
|---|--------|--------|---------|---------|---------|----------|-------|-------|--------|---------|-------|--------|
| A | KDM1A  | ASH1L  | ATF2    | AURKA   | AURKB   | AURKC    | CARM1 | CDYL  | CITR   | CSRP2BP | DNMT1 | DNMT3A |
| B | DNMT3B | DOT1L  | DZIF3   | EHMT2   | ESOM    | ESCO2    | HAT1  | HDAC1 | HDAC10 | HDAC11  | HDAC2 | HDAC3  |
| C | HDAC4  | HDAC5  | HDAC6   | HDAC7   | HDAC8   | HDAC9    | KDM5B | KDM5C | KDM4A  | KDM4C   | KDM6B | KAT2A  |
| D | KAT2B  | KAT5   | MEIO2   | MLL     | MLL3    | MLL5     | MYSM1 | KAT8  | KAT7   | KAT8A   | KAT8B | NCOA1  |
| E | NCOA3  | NCOA6  | NEK6    | NEO1    | PAK1    | PRMT1    | PRMT2 | PRMT3 | PRMT5  | PRMT6   | PRMT7 | PRMT8  |
| F | RNF2   | RNF20  | RPS8K43 | RPS8K45 | SETD1A  | SETD1B   | SETD2 | SETD3 | SETD4  | SETD5   | SETD6 | SETD7  |
| G | SETD8  | SETD81 | SETD82  | SMYD3   | SUN3BH1 | SUN42DH1 | UBE2A | UBE2B | USP16  | USP21   | USP22 | WHSC1  |

**Figure S2.** Genes for 84 epigenetic modifying enzymes whose expression was monitored in AD brain and A $\beta$ -treated neuronal cells.

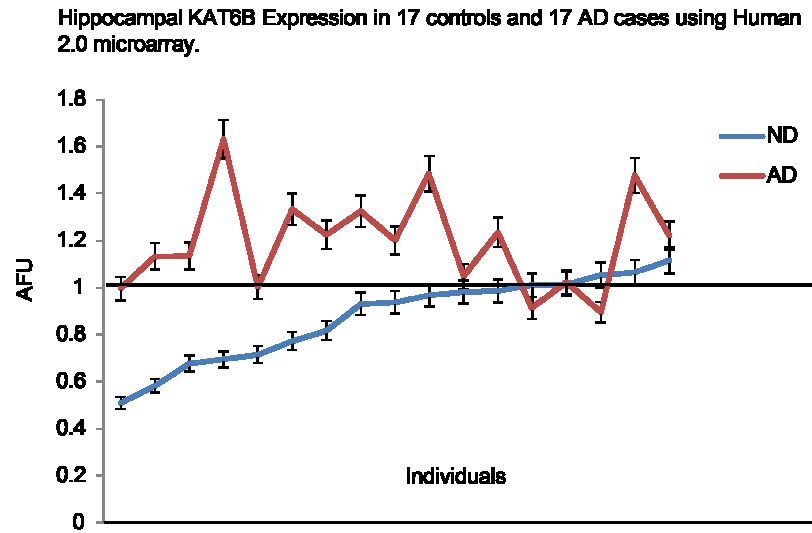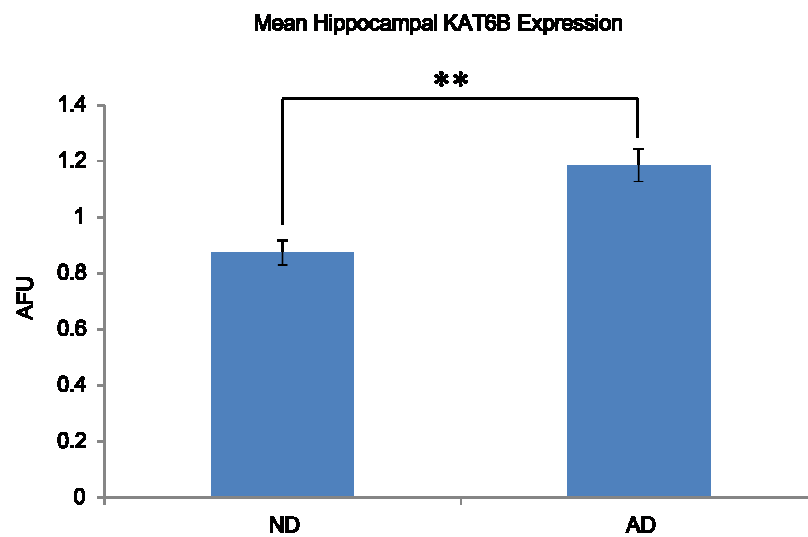

**Figure S3.** Hippocampal expression of histone acetyltransferase gene KAT6B in AD and normal human controls.

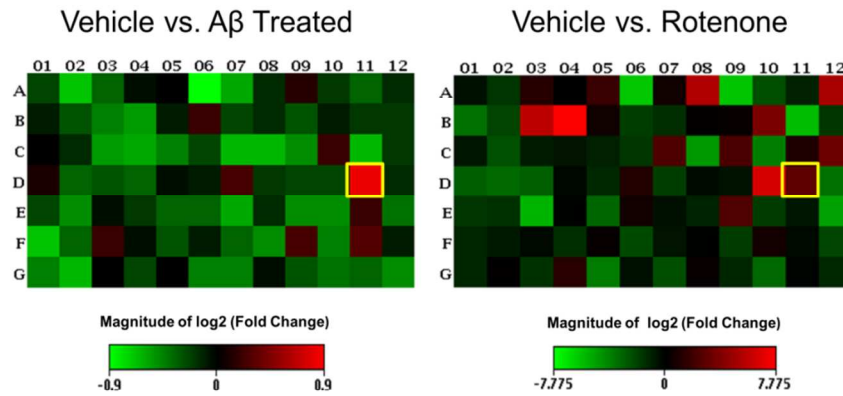

**Figure S4.** Heat maps, which shows the magnitude of log<sub>2</sub> (fold change) of 84 epigenetic transcripts in differentiated SH-SY5Y cells for (left panel) vehicle control vs. oligomeric A $\beta$ O-treated (2  $\mu$ M) and (B) vehicle control vs. rotenone treated (10 nM). The data show that there is a significant correlation between 31 of the down regulated epigenetic transcripts ( $r = 0.55$ ,  $p < 0.05$ ) and 8 up-regulated transcripts ( $r = 0.88$ ,  $p < 0.001$ ). The highlighted box (KAT6B gene) represents an example of a significant ( $p < 0.001$ ) upregulated gene.

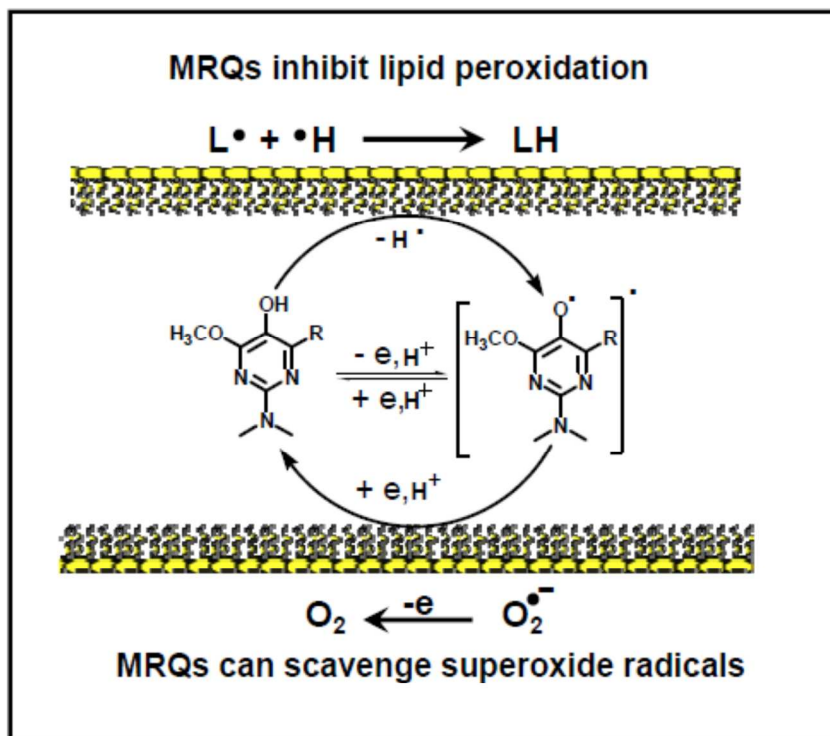

**Figure S5.** Proposed mechanism of action of an MRQ, involving coordinated reductive quenching of lipid radicals and oxidative quenching of superoxide.<sup>34</sup>
